# Supplementary material for: Genome-wide identification and expression profiling of glutathione transferase gene family under multiple stresses and hormone treatments in wheat (Triticum aestivum L.)
Source: PubMed Central journal article supplement (PMC6916456; doi:10.1186/s12864-019-6374-x), 2019-12-16

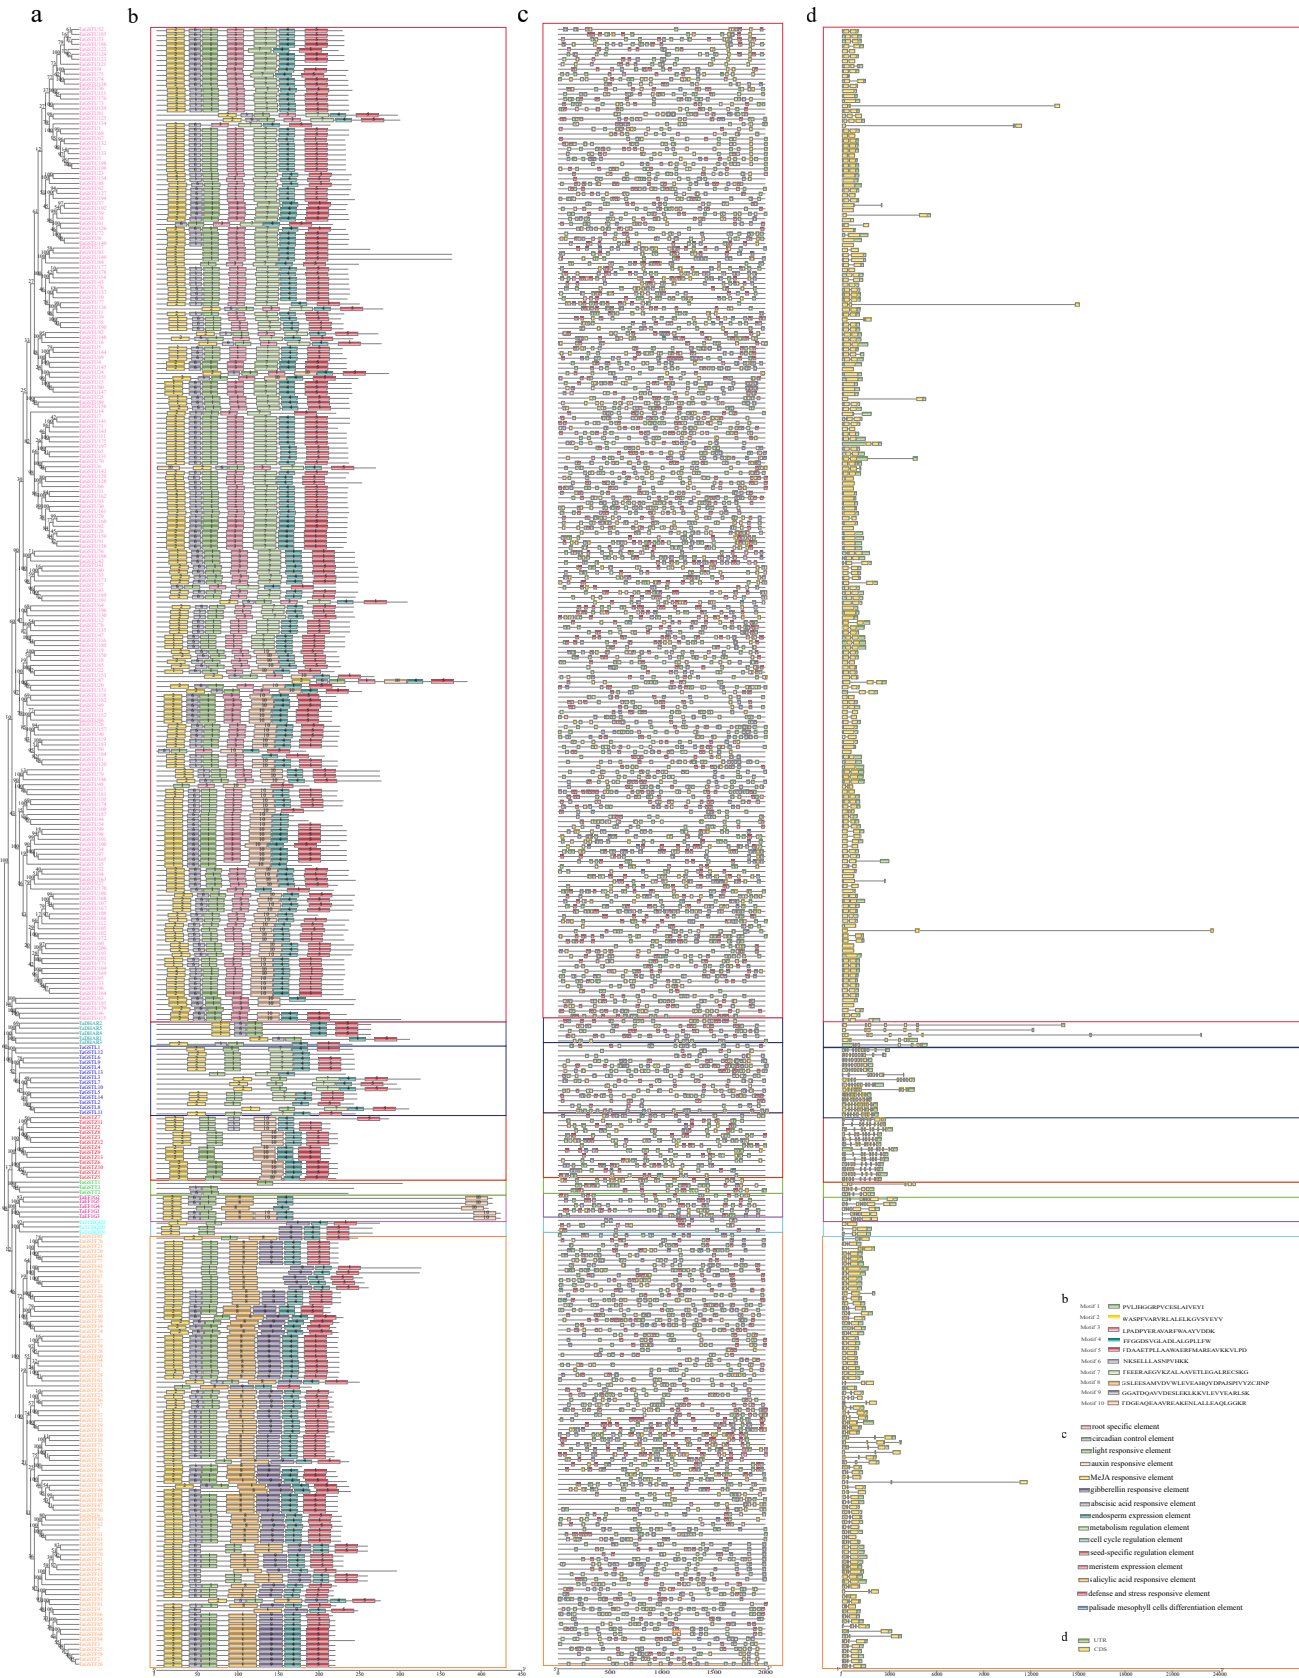

Supplement: 12864_2019_6374_MOESM3_ESM.pdf [file 12864_2019_6374_MOESM3_ESM.pdf]
